# Supplementary material for: An Effective Chemical Permeabilization of Silkworm Embryos
Source: MDPI journal article supplement (doi:10.3390/bioengineering10050563), 2023-05-08
Supplement: s1 [file s1]

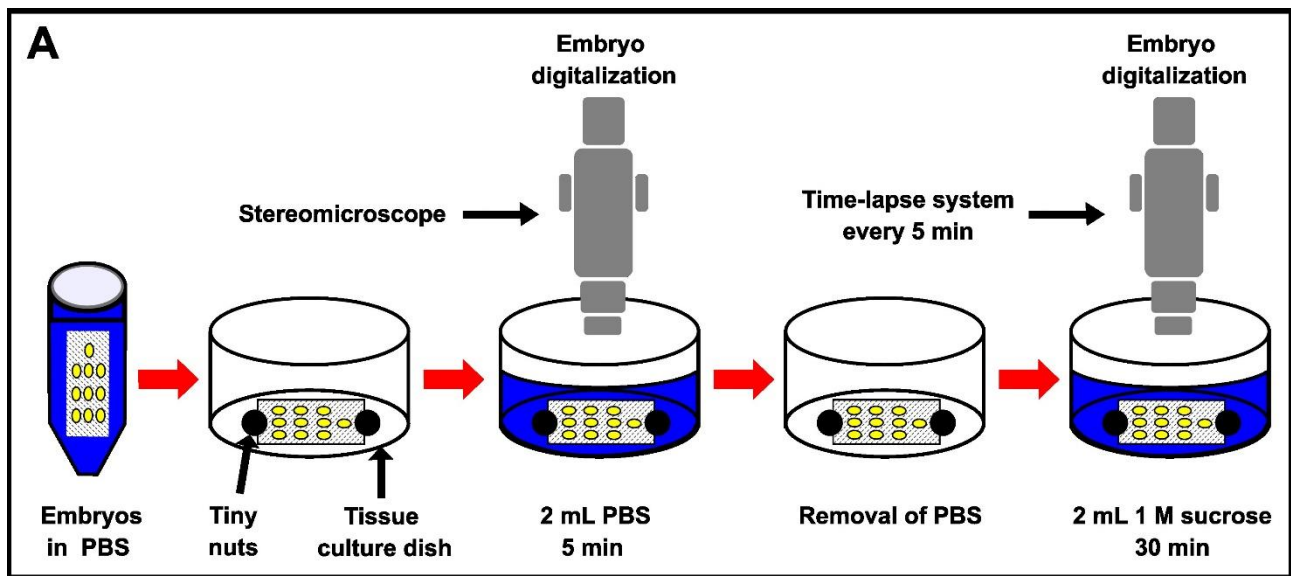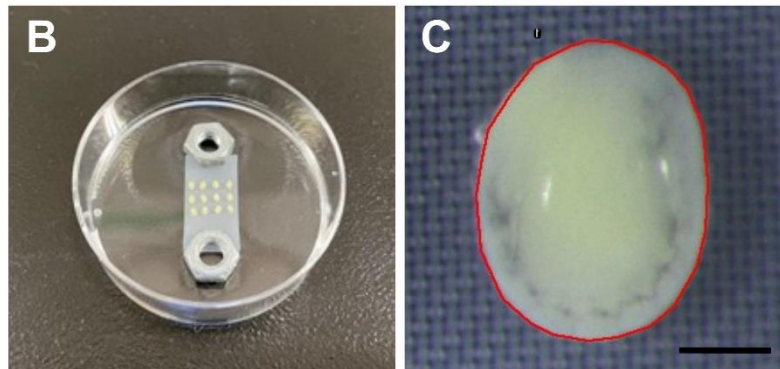

**Figure S1.** Procedure for data collection and analysis of the osmotic response of silkworm eggs. (A) A Schematic presentation of the procedure for imaging area changes in eggs during exposure to 1 M sucrose solution. (B) Photograph of the dechorionated eggs placed and clamped to the dish with tiny nuts. (C) An egg analyzed by ImageJ software; the red line indicates the area defined by related points around the membrane contour of the embryo. Scale bar: 500  $\mu\text{m}$ .

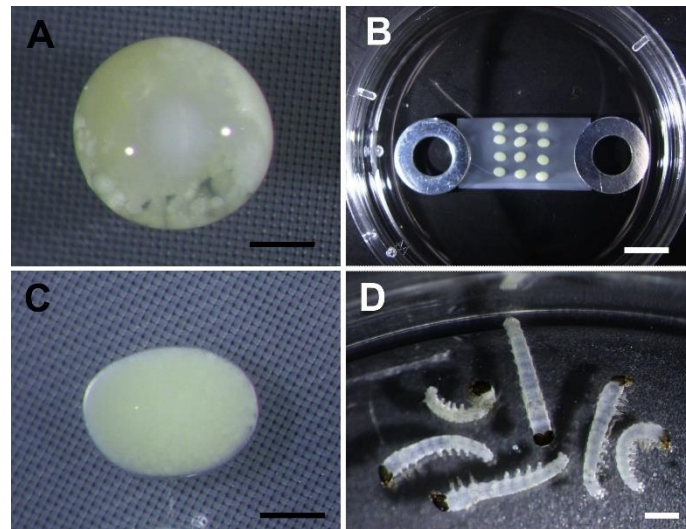

**Figure S2.** Images of permeabilized early embryonic stages of the pnd-w1 strain with a modified culture method using liquid paraffin. (A) An egg with an amorphous shape with the dry-moist culture method. (B) Eggs with the culture method using liquid paraffin. (C) An egg with a normal shape in the culture method using liquid paraffin. (D) Embryos developed following to the serosa ingestion in the modified culture method. Scale bar: 500  $\mu\text{m}$ .

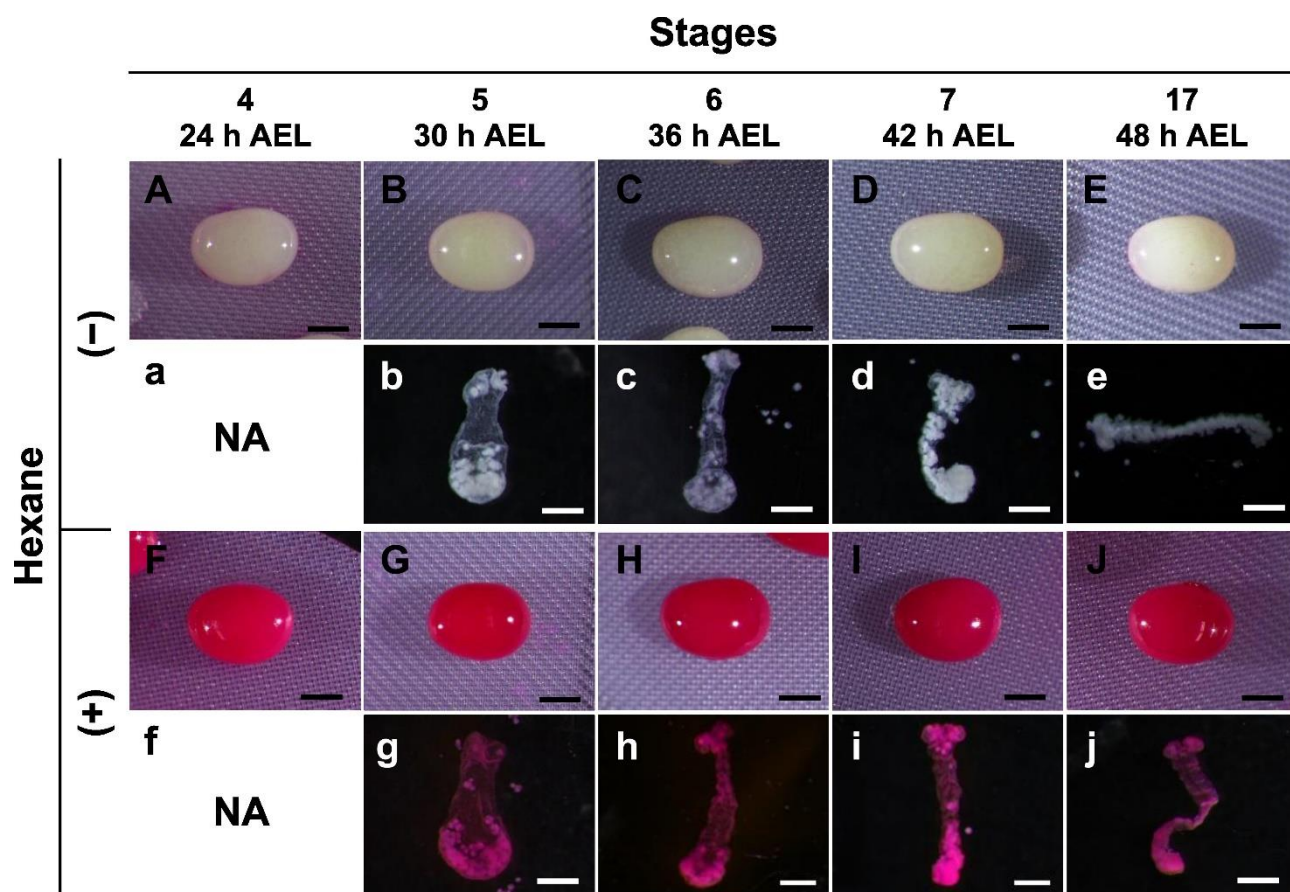

**Figure S3.** Images of permeabilized embryos in the early stages of the pnd-w1 strain. The dechorionated eggs were subjected to a permeabilization treatment with hexane for 30 s, immersed in 0.1% rhodamine B for 10 min, and then rinsed with PBS. (A-E) Eggs without hexane treatment. (a-e) Naked embryos derived from B-E eggs. (F-J) Eggs with hexane treatment. (f-j) Naked embryos derived from F-J eggs. Permeabilized embryos were stained red. NA, not available. Scale bar: 500  $\mu$ m.

**Table S1.** Egg hatchability of fertile moths derived from permeabilized embryos of pnd-w1 and w1 strains.

| Strains | Stage               | No. of moths | No. of eggs laid <sup>a</sup> | No. of hatched embryos <sup>b</sup> | Hatchability (%) <sup>c</sup> |
|---------|---------------------|--------------|-------------------------------|-------------------------------------|-------------------------------|
| pnd-w1  | Early 1-Stage<br>25 | 21           | 338.9 ± 23.0                  | 278.3 ± 25.2                        | 81.9 ± 4.1                    |
| w1      | Early 1-Stage<br>25 | 20           | 379.4 ± 50.3                  | 294.5 ± 37.1                        | 79.9 ± 4.3                    |

<sup>a</sup> Mean number of eggs laid ± SE

<sup>b</sup> Mean number of hatched embryos ± SE

<sup>c</sup> Percentage of hatched eggs to number of eggs laid ± SE
